# Supplementary material for: Nuclear Magnetic Resonance Metabolomics of Symbioses between Bacterial Vaginosis-Associated Bacteria
Source: PubMed Central journal article supplement (PMC9241533; doi:10.1128/msphere.00166-22), 2022-05-02
Supplement: msphere.00166-22-s0002.pdf [file msphere.00166-22-s0002.pdf]

| Metabolite    | CVF swab range | CVF swab mean | Fresh BHI | Spent BHI range |
|---------------|----------------|---------------|-----------|-----------------|
| Acetate       | 0 – 0.049      | 0.019 ± 0.001 | 5.71      | 6.76 – 69.81    |
| Alanine       | 0 – 0.519      | 0.103 ± 0.009 | 4.18      | 4.07 - 14.87    |
| Arginine      | -              | 0.000 ± 0.000 | 3.44      | 0.66 – 3.57     |
| Asparagine    | 0 – 0.280      | 0.031 ± 0.005 | 1.47      | 0.44 – 2.16     |
| Aspartate     | 0 – 0.375      | 0.050 ± 0.007 | 1.63      | 1.23 – 2.87     |
| Betaine       | 0.006 – 0.051  | 0.012 ± 0.008 | 0.57      | 0.44 – 0.64     |
| Cadaverine    | 0 – 0.744      | 0.036 ± 0.010 | -         | -               |
| Choline       | 0 – 0.632      | 0.026 ± 0.007 | 0.19      | 0.15 – 0.36     |
| Ethanol       | 0.146 – 0.259  | 0.219 ± 0.013 | 0.77      | 0.79 - 8.64     |
| Formate       | 0.013 – 0.353  | 0.052 ± 0.005 | 2.24      | 0.66 – 33.73    |
| Fumarate      | -              | 0.000 ± 0.000 | 0.03      | 0.03 – 1.97     |
| Glucose       | 0 – 1.80       | 0.195 ± 0.029 | 10.73     | 0.19 – 9.59     |
| Glutamate     | 0 – 1.174      | 0.279 ± 0.025 | 4.76      | 4.17 – 9.21     |
| Glutamine     | 0 – 0.500      | 0.061 ± 0.007 | -         | -               |
| Glycine       | -              | 0.000 ± 0.000 | 2.46      | 1.64 – 4.69     |
| Isoleucine    | 0 – 0.323      | 0.055 ± 0.006 | 2.79      | 3.40 – 6.42     |
| Lactate       | 0.075 – 15.21  | 3.412 ± 0.290 | 2.61      | 2.04 – 48.39    |
| Leucine       | 0 – 0.679      | 0.135 ± 0.014 | 9.22      | 3.39 – 11.01    |
| Lysine        | 0 – 0.339      | 0.039 ± 0.005 | 6.63      | 6.12 – 8.21     |
| Maltose       | 0 – 1.278      | 0.246 ± 0.029 | -         | -               |
| Methionine    | 0 – 0.164      | 0.025 ± 0.003 | 1.88      | 1.30 – 2.78     |
| Ornithine     | -              | 0.000 ± 0.000 | 0.00      | 0.00 – 3.53     |
| Phenylalanine | 0 – 0.236      | 0.045 ± 0.005 | 2.56      | 0.22 – 3.83     |
| Proline       | -              | 0.000 ± 0.000 | 1.33      | 0.59 – 6.04     |
| Putrescine    | 0 – 0.420      | 0.015 ± 0.005 | -         | -               |
| Pyruvate      | 0 – 0.062      | 0.008 ± 0.002 | 18.45     | 0.97 – 21.60    |
| Succinate     | 0 – 2.674      | 0.174 ± 0.043 | 0.06      | 0 – 17.84       |
| Taurine       | 0 – 0.549      | 0.132 ± 0.011 | -         | -               |
| Threonine     | 0 – 0.472      | 0.069 ± 0.009 | 2.24      | 0.00 – 3.19     |
| Tryptophan    | -              | 0.000 ± 0.000 | 10.4      | 0.85 – 1.12     |
| Tyrosine      | 0 – 0.214      | 0.039 ± 0.004 | 1.54      | 0.20 – 2.57     |
| Tyramine      | 0 – 0.225      | 0.007 ± 0.003 | -         | -               |
| Uracil        | 0 - 0.033      | 0.002 ± 0.001 | 0.23      | 0.03 – 0.63     |
| Valine        | 0 – 0.358      | 0.069 ± 0.007 | 3.04      | 3.68 – 7.10     |
