# Supplementary material for: Nuclear Magnetic Resonance Metabolomics of Symbioses between Bacterial Vaginosis-Associated Bacteria
Source: PubMed Central journal article supplement (PMC9241533; doi:10.1128/msphere.00166-22), 2022-05-02

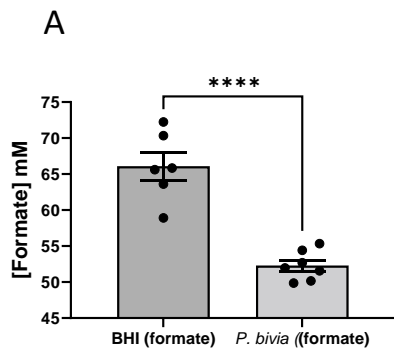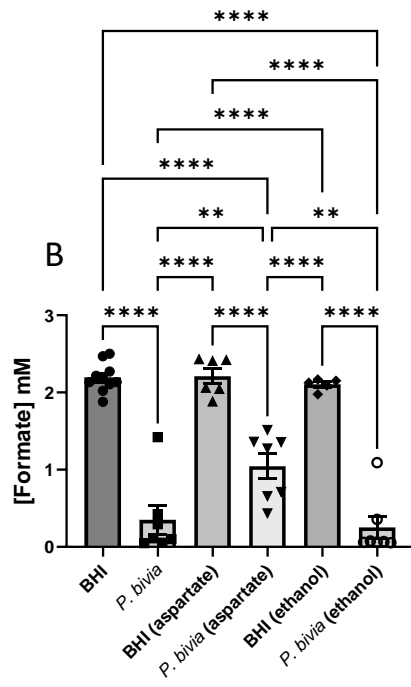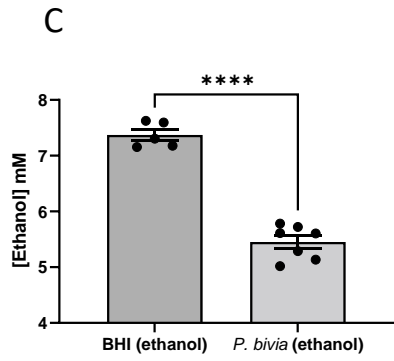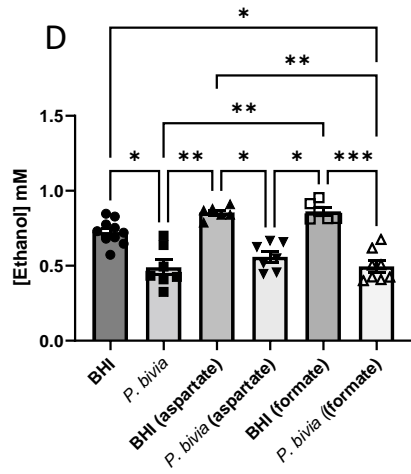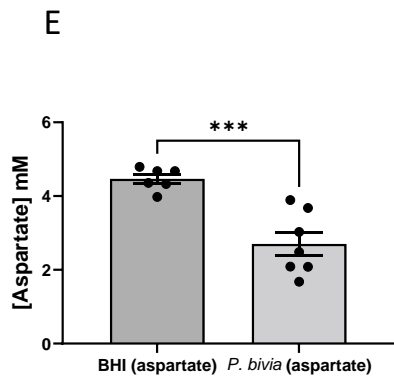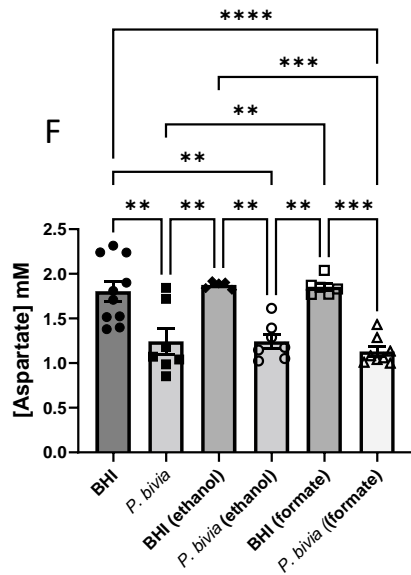

Supplement: msphere.00166-22-s0008.pdf [file msphere.00166-22-s0008.pdf]
